# Supplementary material
Source: publisher figshare collection journal article supplement (https://acs.figshare.com/ndownloader/files/4508953)

## Supporting Information

### One-pot synthesis of graft copolymer by combination of free radical polymerization and polyaddition

Bungo Ochiai, Yuuki Katoh, Takeshi Endo

#### Measurement conditions

$^1\text{H}$  (400 MHz) Nuclear magnetic resonance (NMR) spectra were measured on a JEOL ECX-400 instrument using tetramethylsilane as an internal standard at ambient temperature ( $\text{CDCl}_3$ ). The copolymer compositions and the  $M_{\text{nNMR}}$  values were calculated from integral ratios of the aromatic protons in the stem polymer and the  $-\text{COOCH}_3$  protons in the graft chains. Size exclusion chromatography (SEC) measurements were performed on; using a Tosoh HPLC HLC-8220 system equipped with refractive index and ultraviolet detectors at a flow rate of 0.6 mL/min using *N,N*-dimethylformamide (DMF) containing 10 mM LiBr as an eluent at 40 °C, or a Viscotek TDA302 system equipped with a refractive index detector at a flow rate of 1.0 mL/min using chloroform as an eluent at 40 °C. The column set for HLC-8220 system was as follows: three consecutive hydrophilic vinyl polymer-based gel columns [TSK-GELs (bead size, exclusion limit): SuperAW5000 (7  $\mu\text{m}$ ,  $4 \times 10^6$ ), SuperAW4000 (6  $\mu\text{m}$ ,  $4 \times 10^5$ ), SuperAW3000 (4  $\mu\text{m}$ ,  $6 \times 10^4$ ), 15 cm each] and a guard column [TSK-guard column Super AW-H, 3.5 cm]. Polystyrene standards were employed for calibration. The column set for Viscotek TDA302 system was as follows: four consecutive hydrophilic vinyl polymer-based gel columns [TSK-GELs (bead size, exclusion limit): GMH<sub>XL</sub> (9  $\mu\text{m}$ ,  $4 \times 10^8$ ), G4000H<sub>XL</sub> (5  $\mu\text{m}$ ,  $4 \times 10^5$ ), G3000H<sub>XL</sub> (5  $\mu\text{m}$ ,  $6 \times 10^4$ ), and G2500H<sub>XL</sub> (5  $\mu\text{m}$ ,  $2 \times 10^4$ ) 30 cm each] and a guard column [TSK-guard column H<sub>XL</sub>-H, 4.0 cm]. Polystyrene standards were employed for calibration.

#### Materials

AIBN was recrystallized from methanol. 1,4-Dioxane was distilled over sodium under a nitrogen atmosphere. MMA was dried over  $\text{CaH}_2$  and distilled under reduced pressure. Trimethylene dipiperidine was recrystallized from *n*-hexane. The bisphenol-A-type five-membered cyclic carbonate was prepared from bisphenol-A diglycidyl ether and  $\text{CS}_2$  (ref 7 in the manuscript). Other reagents were used as received.

#### Typical polymerization procedure

A typical procedure for synthesis of polythiourethane-*g*-polyMMA follows. A dioxane (1.25 mL) solution of bisphenol-A type bifunctional cyclic dithiocarbonate (0.25 mmol), trimethylene dipiperidine (0.25 mmol), and AIBN (0.10 mmol) were stirred at room temperature under a nitrogen atmosphere for 18 h. Then, MMA (7.50 mmol) was added. The mixture was stirred at 60 °C for 24 h after the vessel was degassed and sealed. The polymer was isolated by precipitation with methanol or hexane from the THF solution.

## Results of polymerization

Graft copolymerization of various feed ratios of MMA from *in situ* prepared poly(thiourethane ) at 60°C. <sup>a)</sup>

| Run | Feed ratio<br>[MMA] /<br>[SH] | Conv.<br>of<br>MMA<br>[%] <sup>b)</sup> | yield<br>[%] <sup>d)</sup> | copolymer<br>composition<br>[MMA / SH] <sup>b)</sup> | $M_n \times 10^{-4} (M_w / M_n)^c)$ |                |                |
|-----|-------------------------------|-----------------------------------------|----------------------------|------------------------------------------------------|-------------------------------------|----------------|----------------|
|     |                               |                                         |                            |                                                      | RI                                  | Viscosity      | RALLS          |
| 1   | 15                            | >99                                     | 93.5 <sup>d)</sup>         | 14.7                                                 | 1.92<br>(3.90)                      | 2.64<br>(5.42) | 13.4<br>(2.12) |
| 2   | 30                            | >99                                     | 87.3 <sup>d)</sup>         | 28.9                                                 | 3.51<br>(2.80)                      | 4.87<br>(3.74) | 12.0<br>(2.56) |
| 3   | 40                            | >99                                     | 89.7 <sup>e)</sup>         | 41.2                                                 | 3.95<br>(2.82)                      | 5.23<br>(3.64) | 12.6<br>(2.58) |
| 4   | 60                            | >99                                     | 92.9 <sup>e)</sup>         | 70.9                                                 | 4.39<br>(2.92)                      | 4.82<br>(3.89) | 21.2<br>(2.18) |
| 5   | 80                            | >99                                     | 93.2 <sup>e)</sup>         | 81.6                                                 | 7.43<br>(2.44)                      | 10.0<br>(3.35) | 28.4<br>(2.70) |
| 6   | 120                           | >99                                     | 88.7 <sup>e)</sup>         | 136                                                  | 8.95<br>(2.66)                      | 10.9<br>(3.10) | 35.3<br>(2.66) |
| 7   | 200                           | 99.4                                    | 84.5 <sup>e)</sup>         | 176                                                  | 10.0<br>(3.34)                      | 14.2<br>(2.47) | 49.5<br>(5.95) |
| 8   | 400                           | 97.3                                    | 82.1 <sup>e)</sup>         | 415                                                  | 12.3<br>(2.43)                      | 34.6<br>(2.39) | 87.0<br>(7.74) |

<sup>a)</sup> The stem polymer was prepared from BPA5DT and TMDP in 1,4-dioxane (1.25ml) at 60 °C for 18 h in degassed tube. Graft copolymerization with MMA was conducted in degassed sealed tubes at 60 °C for 24 h. <sup>b)</sup> Determined by <sup>1</sup>H-NMR spectroscopy. <sup>c)</sup> Estimated by SEC (polystyrene standard, THF). <sup>d)</sup> Isolated yield after precipitation with *n*-hexane. <sup>e)</sup> Isolated yield after precipitation with methanol.

Figure S1.  $^1\text{H}$  NMR spectrum of the polymers.

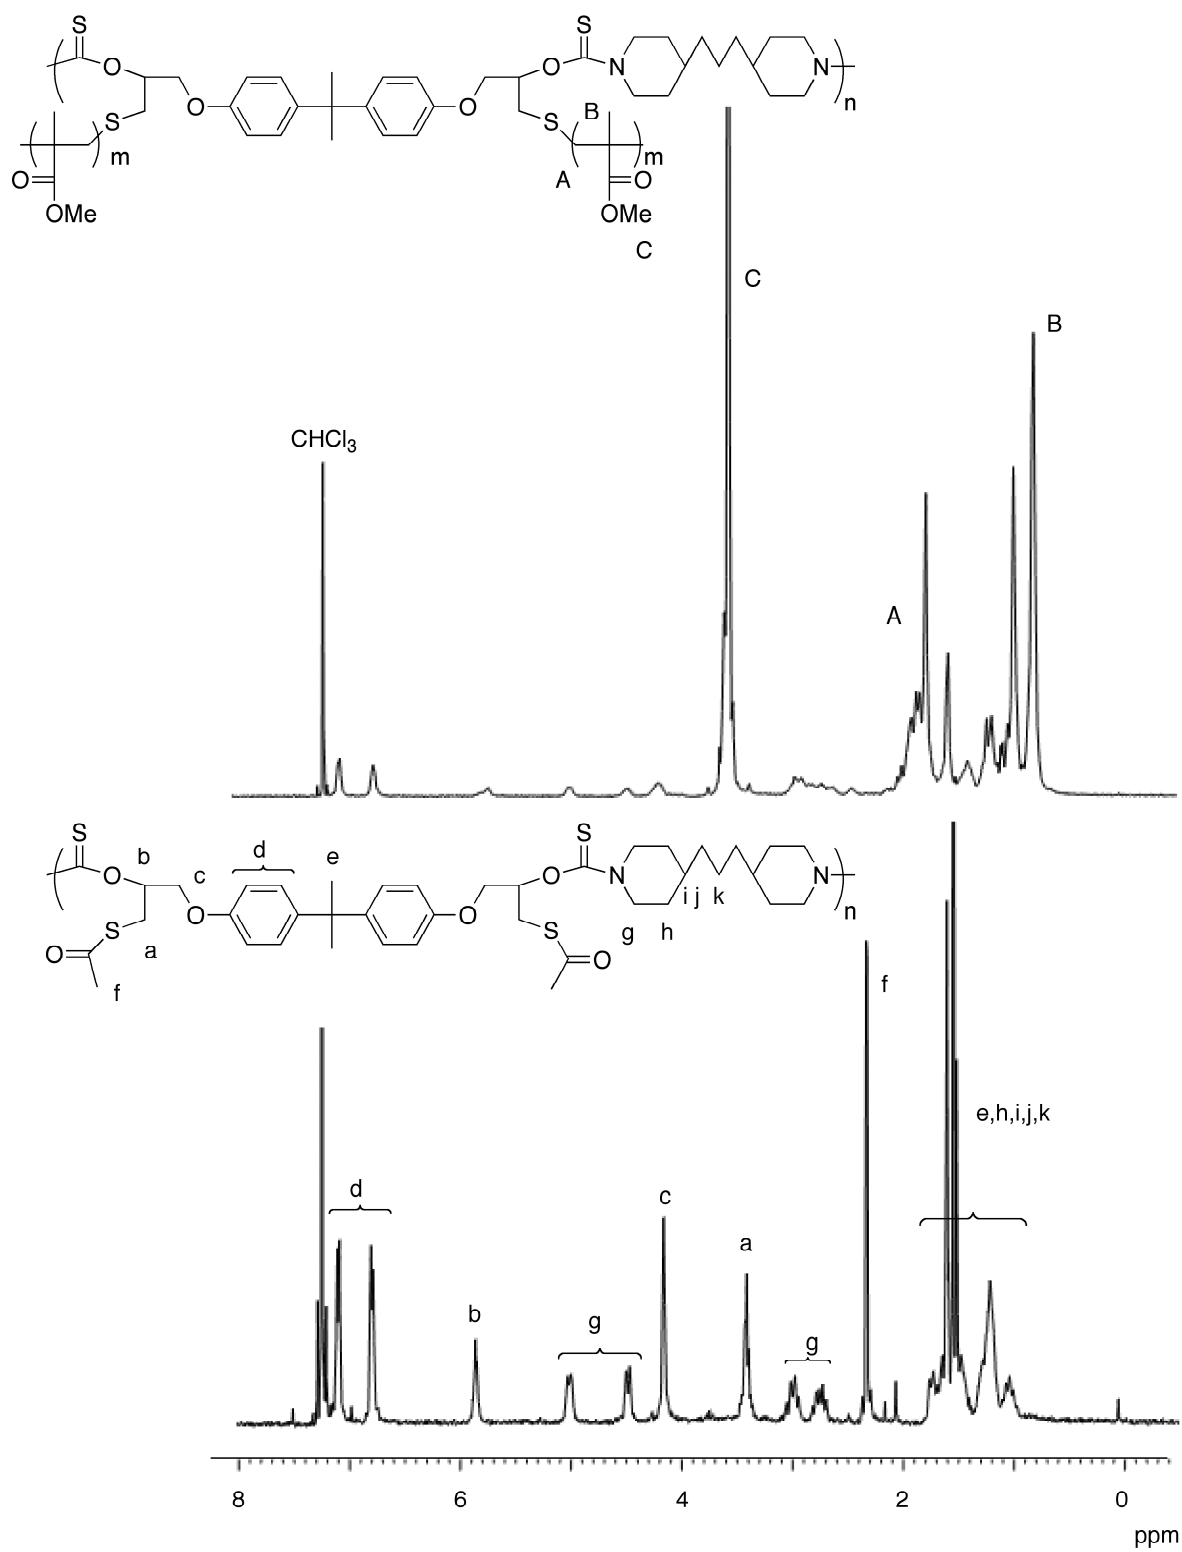

Figure S2. SEC profiles of the graft copolymers (RALLS).

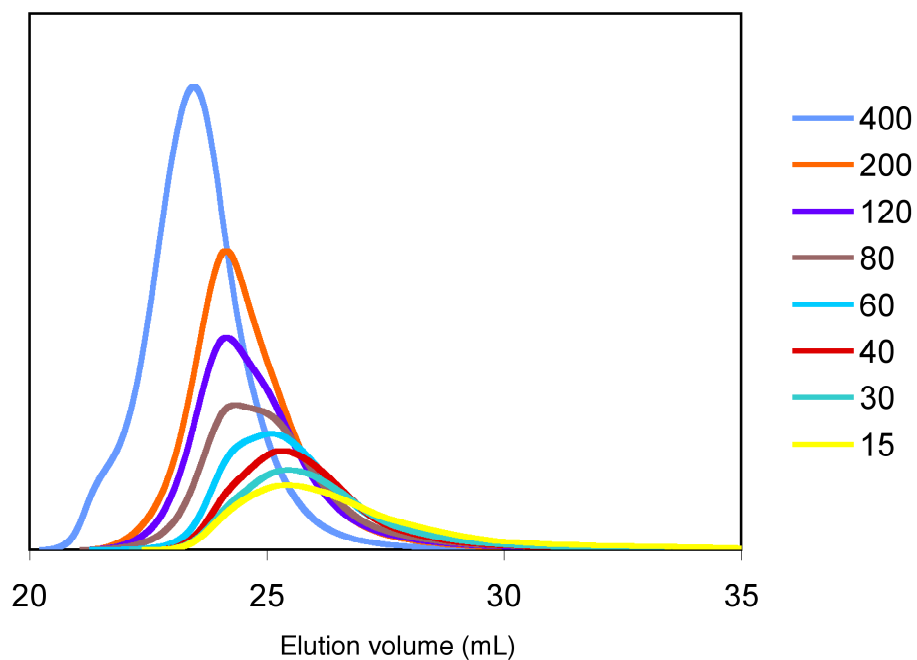

Figure S3. Conversion versus  $M_{nRALLS}$  relationship in radical polymerization of MMA in the presence of poly(mercapto-thiourethane) ( $[MMA]/[SH] = 120$ ).

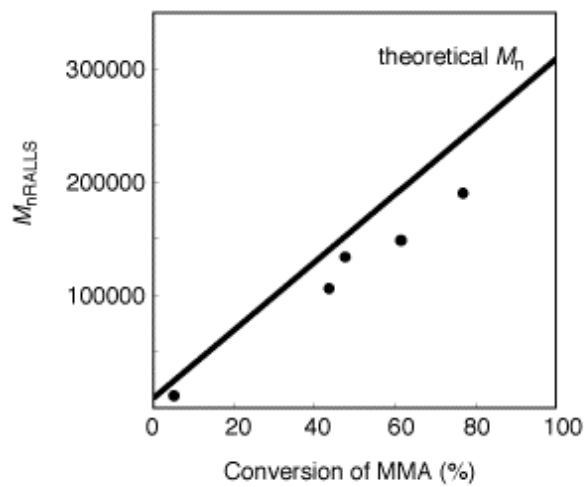

Figure S4. Time versus conversion and  $\ln([MMA]_0/[MMA])$  relationships in radical polymerization of MMA in the presence of poly(mercapto-thiourethane) ( $[MMA]/[SH] = 120$ ).

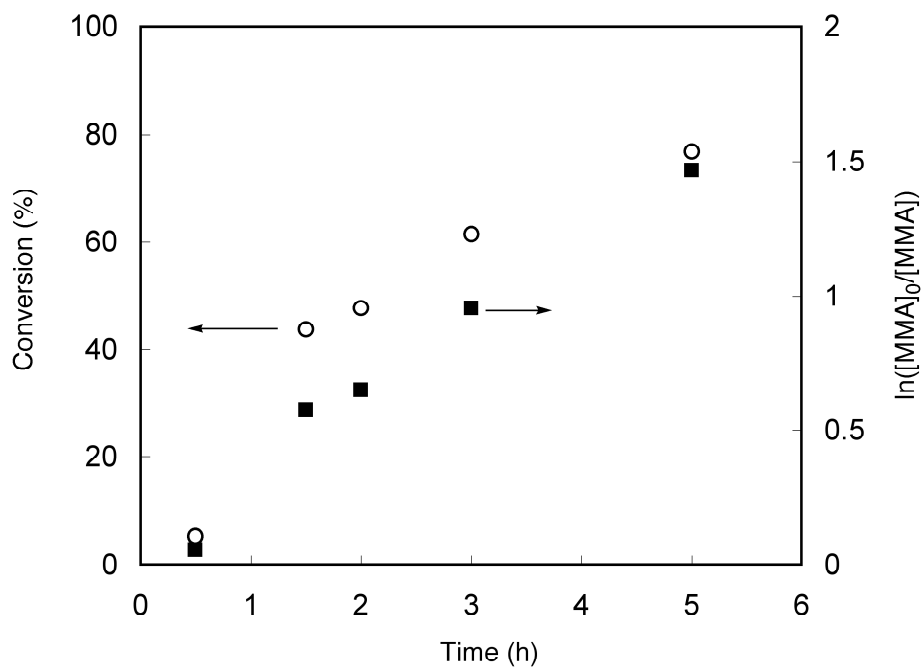

Supplement: Supplementary file 1 [file 4508953]
